# Supplementary material for: AI co-pilot bronchoscope robot
Source: PubMed Central journal article supplement (PMC10764930; doi:10.1038/s41467-023-44385-7), 2024-01-04
Supplement: 41467_2023_44385_MOESM3_ESM.pdf [file 41467_2023_44385_MOESM3_ESM.pdf]

## **Description of Additional Supplementary Files**

### **File name: Supplementary Movie 1**

#### **Description: Overview of AI co-pilot bronchoscope robot.**

The movie introduces the design of AI co-pilot bronchoscope robot, the component of AI-human shared control algorithm, teleoperation experiment, simulation results, self-centering control experiments, in vitro and in vivo experiments.

### **File name: Supplementary Movie 2**

#### **Description: In Vitro Experiment of Bronchial Phantom 1.**

The movie shows the bronchoscopy procedures by the expert with teleoperation and the novice doctor with AI co-pilot on the bronchial phantom 1.

### **File name: Supplementary Movie 3**

#### **Description: In Vitro Experiment of Bronchial Phantom 2.**

The movie shows the bronchoscopy procedures by the expert with teleoperation and the novice doctor with AI co-pilot on the bronchial phantom 2.

### **File name: Supplementary Movie 4**

#### **Description: In Vivo Experiment of Live Porcine Lung Model**

The movie shows the bronchoscopy procedure by the expert with teleoperation and the novice doctor with AI co-pilot in the live porcine lung.
